# Supplementary material for: Transcriptome research identifies four hub genes related to primary myelofibrosis: a holistic research by weighted gene co-expression network analysis
Source: Aging (Albany NY). 2021 Oct 11;13(19):23284–307. doi: 10.18632/aging.203619 (PMC8544335; doi:10.18632/aging.203619)
Supplement: Supplementary Table 1 [file aging-13-203619-s001.xlsx]

## Sheet: Sheet1
Supplementary Table 1. All of gene symbols in green module.
gene symbol
CA1
SNCA
CALR
GYPB
BPGM
GYPA
ABCC13
ISCA1
MPL
AHSP
FECH
SELENBP1
ANKRD9
YOD1
SLC14A1
CCDC176
MBNL3
ALAS2
KLF1
FAM46C
EPB42
RNF11
HEPACAM2
CR1L
CR1 /// CR1L
KRT1
FGFR1OP2
HEMGN
RHAG
SESN3
SLC4A1
GMPR
KLC3
TNS1
TRIM58
NUDT4 /// NUDT4P1
TPGS2
LOC102724387
C7orf73 /// LOC101930655
GLRX5
GSPT1
WNK1
FKBP1B
BNIP3L
MYL4
RAP1GAP
HPS1
HBD
PBX1
FAXDC2
PITHD1
CISD2
RIOK3
GYPE
TRAK2
TSPAN5
C2orf88
GPR146
MXI1
RAB2B
SMIM5
SLC6A8
RP11-382F24.1 /// RP11-382F24.2
HBM
FAM104A
FBXO9
STOM
OSBP2
RBM38
PLEK2
FAM210B
TMOD1
JAZF1
CTNNAL1
SIAH2
STRADB
SEC62
WDR26
NINJ2
PRDX2
SRRD
HBQ1
CLIC2
TMCC2
ANK1
FOXO3
BLVRB
JHDM1D-AS1
TPM1
ELL2
KAT2B
NFIX
SNX3
FHL2
PIP4K2A
PCGF5
ANKH
MIR4746 /// UBXN6
GNAS
MKRN1
CHPT1
PPM1A
PID1
UBBP1 /// UBBP1 /// UBBP4 /// UBBP4
ST6GALNAC4
POLR1D
RUNDC3A
TMEM86B
SLC25A37
ZDHHC2
E2F2
EIF2AK1
CDC34
PSMF1
BRAF
ACSL6
MOSPD1
FRMD4A
POC1B
SLC7A5
USP12
BMP2K
NPRL3
ASCC2
LGALS3
MPP1
ACP1
ITLN1
DPCD
KANK2
SLC38A5
CDKL1
DPM2
PCTP
MAN1A1
TFDP1
RCOR3
NFIA
LOC101927752
ADIPOR1
CA2
ACKR1
TTC25
DCAF10
CARM1
TAL1
GLUL
RGCC
SETX
NATD1
CYBRD1
DCAF12
ALDH5A1
ABCG2
PPP3R1
RBX1
BTG1
CDKN2C
2020-03-08
PRDX6
EMC3
YBX3
OPTN
ARHGEF12
SLC1A5
LOC729870
C7orf73
ABCC4
SLC25A39
NEDD4L
LYL1
YPEL4
UBBP2 /// UBBP2
PIP5K1B
UBE2H
KDM7A
RNF10
GUK1
TCP11L2
SLC2A1
BAG1
DCUN1D1
CREG1
TESC
CITED2
FUNDC2
TGM2
FLCN
GYPC
HMBS
BCL2L1
RPIA
ZFAND5
GCLC
RHCE /// RHD
TRIM10
HEBP1
AGO2
TCF3
DDI2 /// RSC1A1
HBBP1
KCNH2
C20orf196
PAQR9
PLEKHG3
CUL4A
SFRP2
TSPO2
HAGH
DMTN
ST13
KSR1
NME4
WDR45
C9orf78
SELK
ELOVL6
